# Supplementary material for: Efficient, scalable, closed-loop synthesis of highly crystalline pure phase MgAl-layered double hydroxides intercalated with hydroxyl anions
Source: Royal Society of Chemistry journal article supplement (doi:10.1039/d1dt03849d), 2021-12-16
Supplement: d1dt03849d1.pdf [file d1dt03849d1.pdf]

## Electronic Supplementary Information

### Efficient, scalable, closed-loop synthesis of highly crystalline pure phase MgAl-layered double hydroxides intercalated with hydroxyl anions

*Luofu Min, Jingying Duan, Lu Liu, Sheng Ge, Wen Zhang, Yuxin Wang\**

State Key Laboratory of Chemical Engineering  
Tianjin Key Laboratory of Membrane Science and Desalination Technology  
School of Chemical Engineering and Technology, Tianjin University, Tianjin 300072, China.

\*Corresponding author. E-mail address: [yxwang@tju.edu.cn](mailto:yxwang@tju.edu.cn)

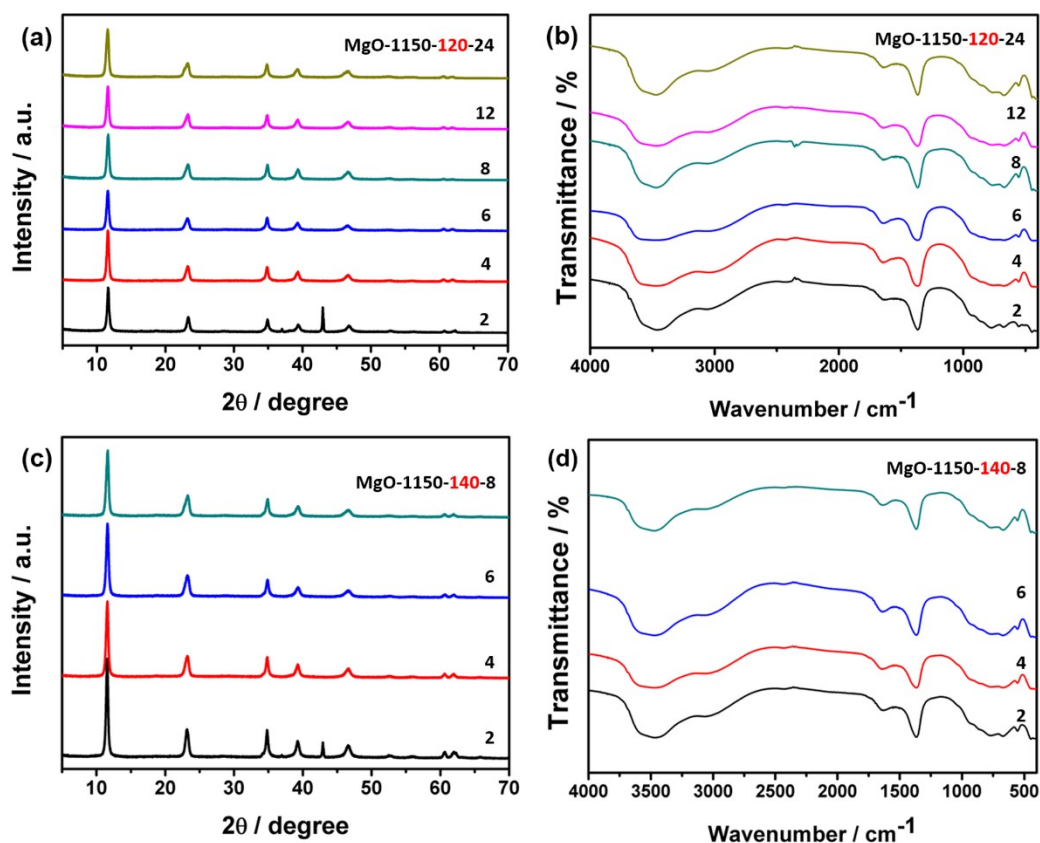

Fig. S1 XRD patterns and FTIR spectra of MgO-1150-T-t.

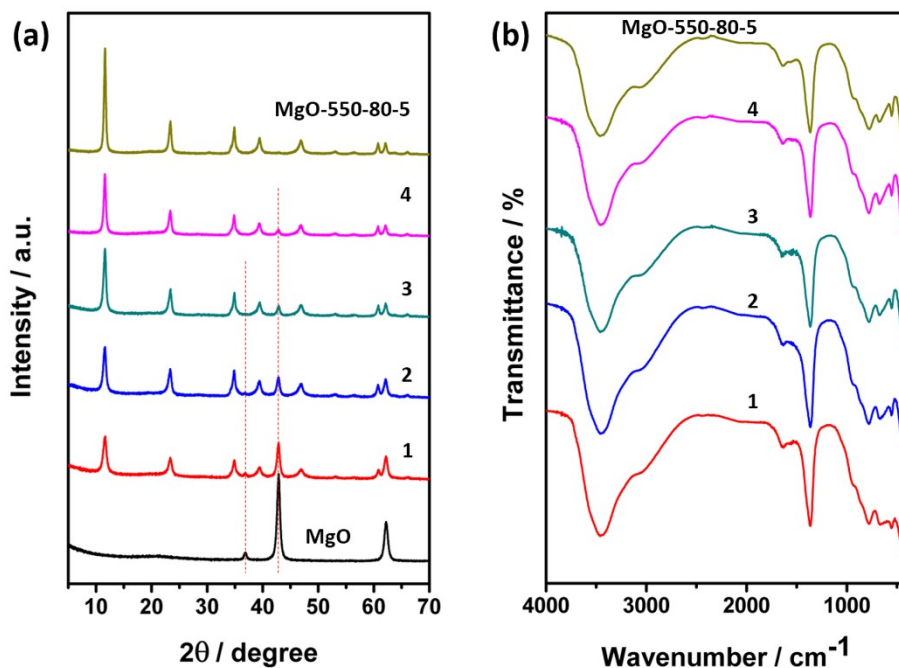

**Fig. S2** XRD patterns and FTIR spectra of MgO-550-80-t.

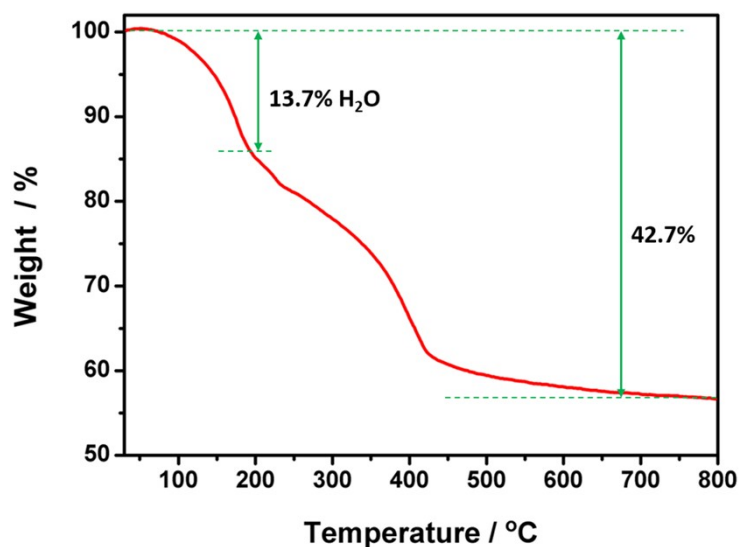

**Fig. S3** TGA of MgO-550-80-5. The first weight loss step (30-180 °C) is assigned to the removal of water molecules in the interlayer of MgAl-LDH. The contents of Mg and Al in LDH were detected by ICP, and the Mg/ Al ratio is 2.57:1. The carbon content determined via CHN is 0.3 wt%. Consequently, the chemical formula of MgO-550-80-5 was estimated to be  $[\text{Mg}_{0.720}\text{Al}_{0.280}(\text{OH})_2](\text{OH})_{0.242}(\text{CO}_3)_{0.019} \cdot 0.57\text{H}_2\text{O}$ . The total weight loss (42.7%) is consistent with the calculated value (42.0%) on the basis of the empirical formula.

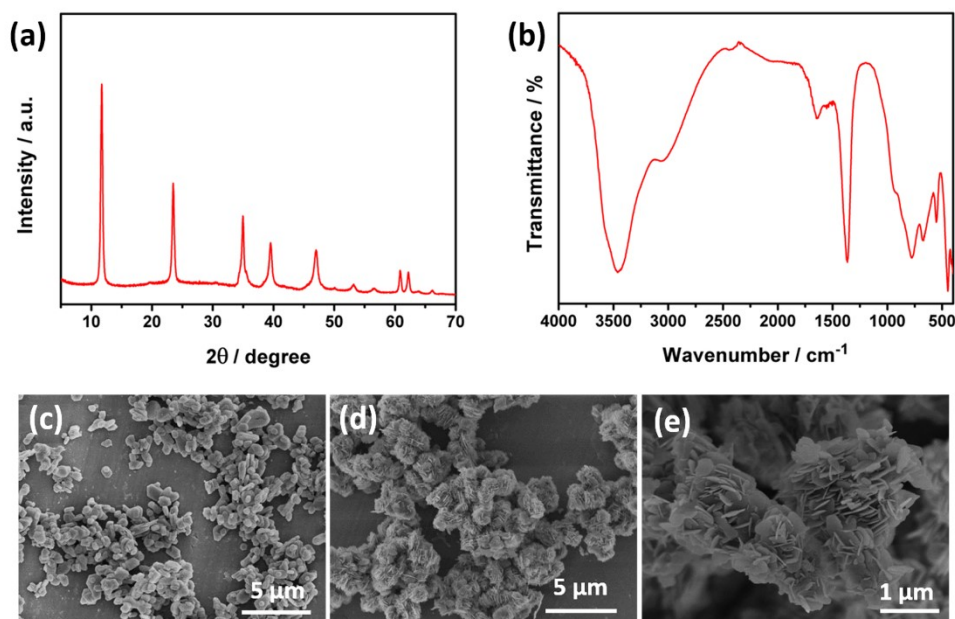

**Fig. S4** MgAl-LDH from regenerative  $\text{NaAlO}_2$ . (a) XRD pattern and (b) FTIR spectrum of MgO-550-80-5, (c) SEM image of pristine MgO-550, (d and e) SEM images of MgO-550-80-5.

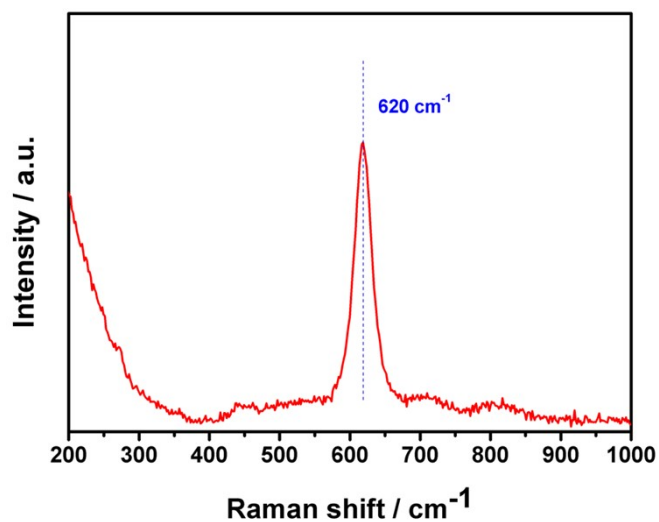

**Fig. S5** Raman spectrum of  $\text{NaAlO}_2$  solution (1.5 M). The peak at  $620\text{ cm}^{-1}$  is assigned to symmetric stretching vibration<sup>1</sup> of tetrahedral  $\text{Al}(\text{OH})_4^-$ .

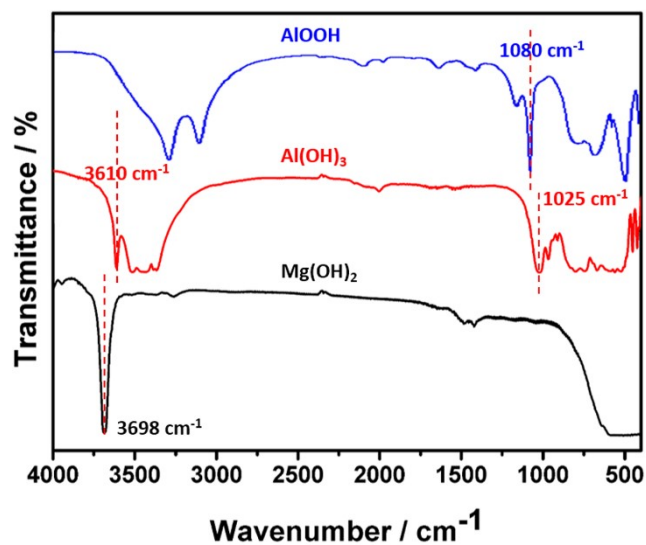

**Fig. S6** FTIR spectra of  $\text{Mg(OH)}_2$ ,  $\text{Al(OH)}_3$ , and  $\text{AlOOH}$ .

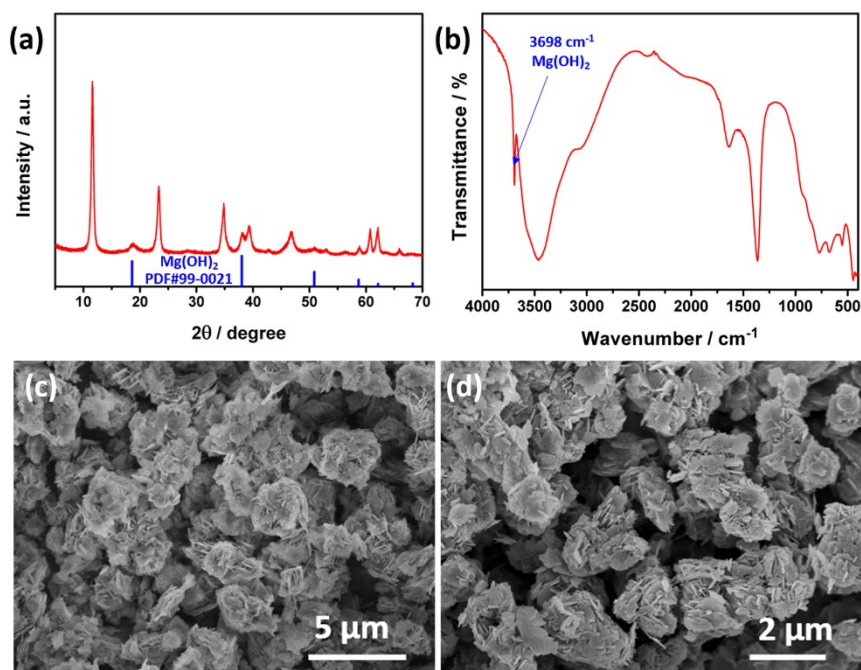

**Fig. S7** (a) XRD pattern, (b) FTIR spectrum, and (c and d) SEM images of  $\text{MgO-550-120-1}$ . The trace of  $\text{Mg(OH)}_2$  can be observed in XRD pattern and FTIR spectrum. The sharp absorption peak at  $3698\text{ cm}^{-1}$  in FTIR spectrum is assigned to the stretching vibration of OH in  $\text{Mg(OH)}_2$ .

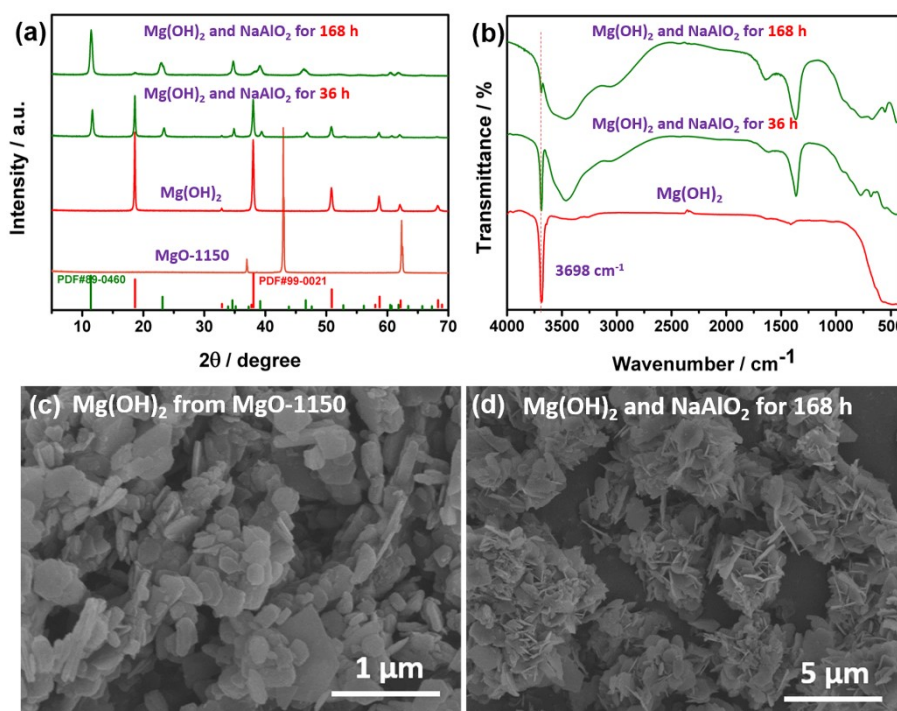

**Fig. S8** Two-steps synthesis of MgAl-LDH from MgO [ $\text{Mg(OH)}_2$ ] and  $\text{NaAlO}_2$  at 100 °C. (a) XRD patterns, (b) FTIR spectra, (c) SEM image of  $\text{Mg(OH)}_2$  from MgO-1150 at 100 °C, (d) SEM image of the precipitates after 168 h. MgO-1150 was converted completely into  $\text{Mg(OH)}_2$  by hydrothermal treatment at 100 °C for 12 h. Then,  $\text{NaAlO}_2$  was added to the hydrothermal system. According to the Le chatelier's law, the dissolution-precipitation equilibrium of  $\text{Mg(OH)}_2$  shifts because of the removal of  $\text{Mg}^{2+}$  for constructing MgAl-LDH in the presence of  $\text{Al(OH)}_4^-$ . Indeed, the MgAl-LDH phase presented in the precipitates. However, a great deal of  $\text{Mg(OH)}_2$  survived even after 36 h. Although MgAl-LDH is more thermodynamically stable than  $\text{Mg(OH)}_2$ ,<sup>2</sup> the dissolution rate of  $\text{Mg(OH)}_2$  was suppressed dramatically in an alkaline condition ( $\text{pH} > 11.7$ , 25°C) owing to the “common-ion effect”. After 168 h, a trace of  $\text{Mg(OH)}_2$  still can be observed, which is much slower than that of MgO. Given the sluggish kinetics of  $\text{Mg(OH)}_2$  compared with MgO, it can be inferred that the  $\text{Mg(OH)}_2$  is not the essential intermediate during DIDR, otherwise  $\text{Mg(OH)}_2$  would be detected in FTIR spectra and XRD patterns.

**Table S1** Specific surface areas of commercial products of MgAl-LDH and MgO-550-80-5.

|   | Company                                                   | Type         | Specific area/ m <sup>2</sup> g <sup>-1</sup> |
|---|-----------------------------------------------------------|--------------|-----------------------------------------------|
| 1 | Sakai Chemical Industry Co., Ltd.                         | HT-1         | <b>6-12</b>                                   |
| 2 | Kyowa Kagaku Kogyo Co., Ltd.                              | DHT-4        | <b>10-15</b>                                  |
| 3 | Hunan Shaoyang Tiantang Auxiliaries<br>Chemical Co., Ltd. | -            | <b>8-20</b>                                   |
| 4 | HEOWNS                                                    | -            | <b>20</b>                                     |
| 5 | This work                                                 | MgO-550-80-5 | <b>56.3</b>                                   |

## References

1. Johnston, C. T.; Agnew, S. F.; Schoonover, J. R.; Kenney, J. W.; Page, B.; Osborn, J.; Corbin, R, *Environ. Sci. Technol.* 2002, **36**, 2451-2458.
2. Johnson, C. A.; Glasser, F. P, *Clays Clay Miner.* 2003, **51**, 1-8.
